# Supplementary material for: Biodegradation of hydroxylated boron nitride nanoplatelets, their toxic effect and drug delivery application
Source: Royal Society of Chemistry journal article supplement (doi:10.1039/d4ra04433a), 2024-01-01
Supplement: d4ra04433a1.pdf [file d4ra04433a1.pdf]

## Supporting information

### Biodegradation of Hydroxylated Boron Nitride Nanoplatelets, Their Toxic Effect and Drug Delivery Application

*Kanwal Asif<sup>a,b,c</sup>, Md. Mahbubur Rahman<sup>d</sup>, Andrea Augusto Sfriso<sup>e</sup>, Salvatore Parisi<sup>a</sup>, Vincenzo Canzonieri<sup>a,f</sup>, Isabella Caligiuri<sup>a</sup>, Flavio Rizzolio<sup>a,b\*</sup>, Muhammad Adeel<sup>b,g\*</sup>*

<sup>a</sup> Pathology Unit, Centro di Riferimento Oncologico di Aviano (C.R.O.) IRCCS, 33081, Aviano, Italy

<sup>b</sup> Department of Molecular Sciences and Nanosystems, Ca' Foscari University of Venice, 30172, Venice, Italy

<sup>c</sup> Centre for Endocrinology, Charterhouse Square, Queen Mary University of London, London EC1M 6BQ

<sup>d</sup> Department of Energy Material Science & Engineering, Konkuk University, Chungju 27478, Republic of Korea

<sup>e</sup> Department of Chemical and Pharmaceutical Sciences, University of Ferrara, Italy

<sup>f</sup> Department of Medical, Surgical and Health Sciences, University of Trieste, 34149, Trieste, Italy

<sup>g</sup> Department of Bioengineering, Royal School of Mines, Imperial College London, London, SW7 2AZ, UK

\*Corresponding authors

Muhammad Adeel

Department of Bioengineering, Royal School of Mines

Imperial College London

m.adeel@imperial.ac.uk

Tel.: +39-041 2348910

Fax: +39-041 2348594

Flavio Rizzolio

Department of Molecular Sciences and Nanosystems

Ca' Foscari University of Venice

flavio.rizzolio@unive.it

Tel.: +39-041 2348910

Fax: +39-041 2348594

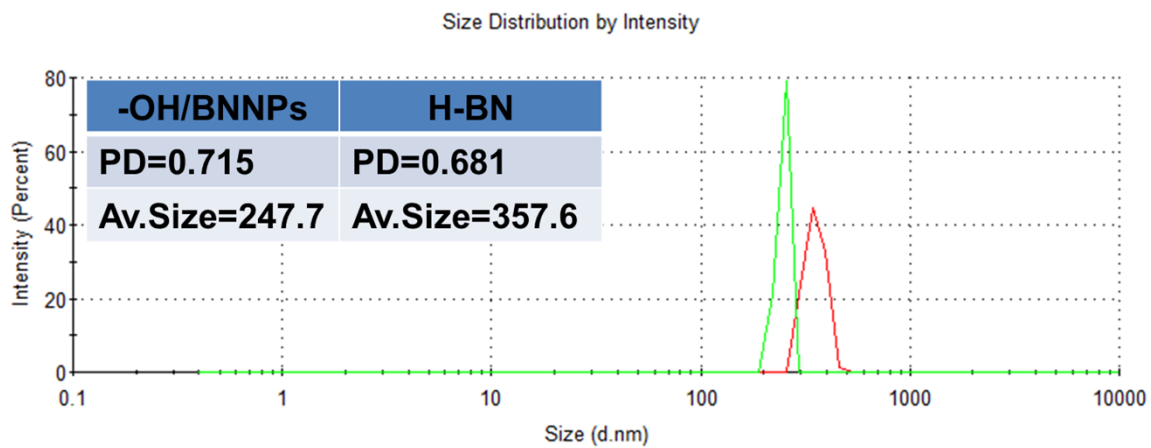

**Fig. S1:** DLS of pristine h-BN and -OH/BNNPs.

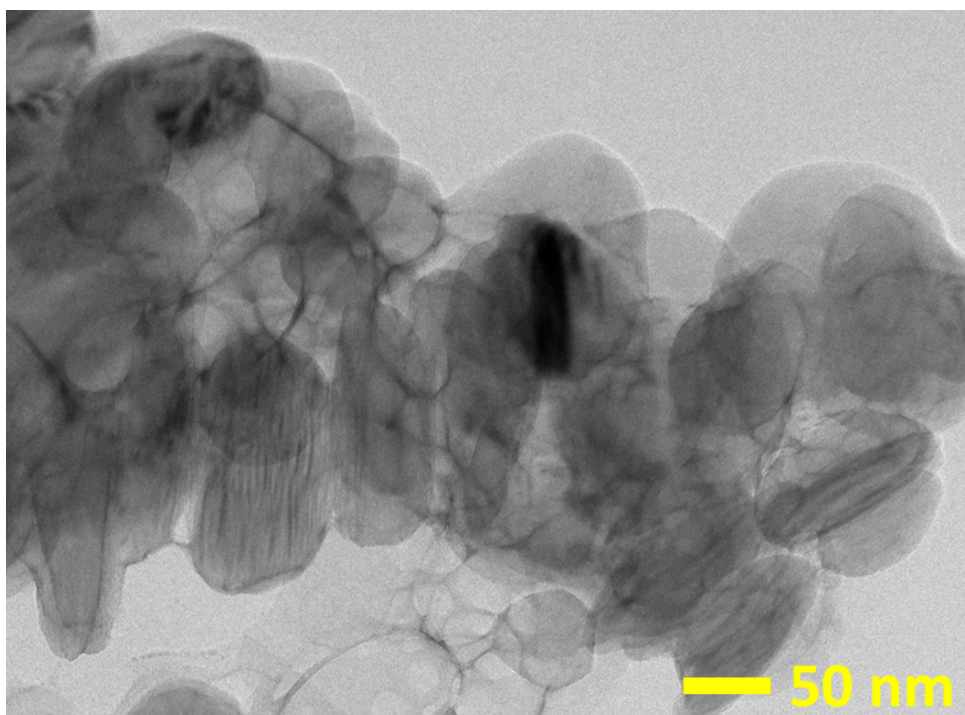

**Fig. S2:** HR-TEM image of the -OH/BNNPs

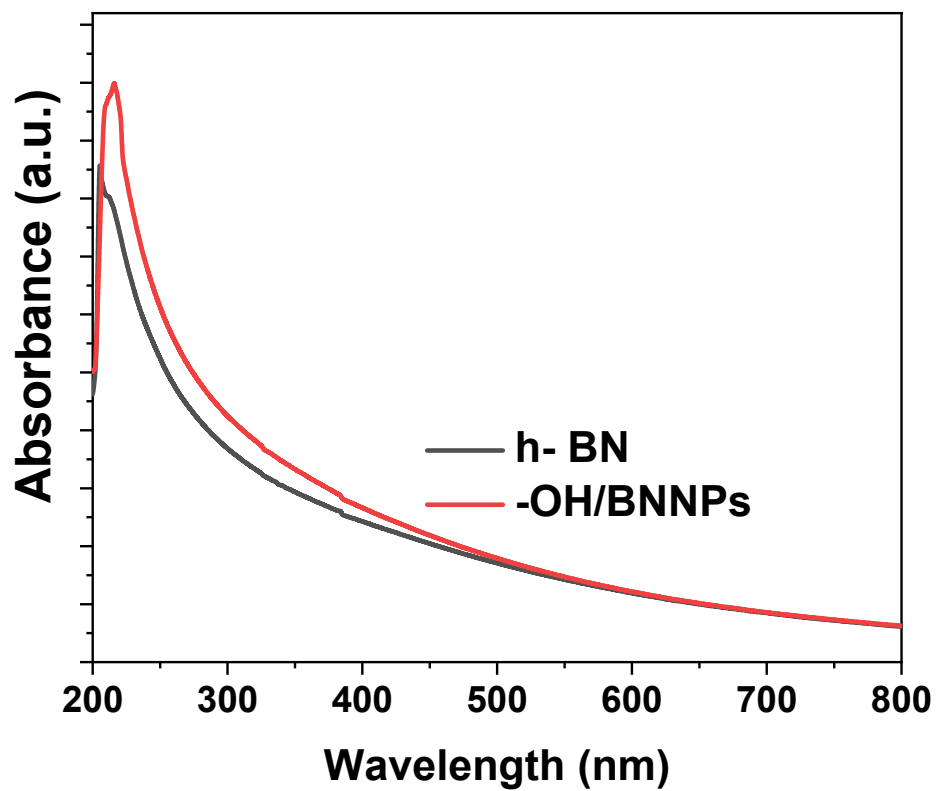

**Fig. S3:** UV spectra of bulk h-BN and -OH/BNNPs.

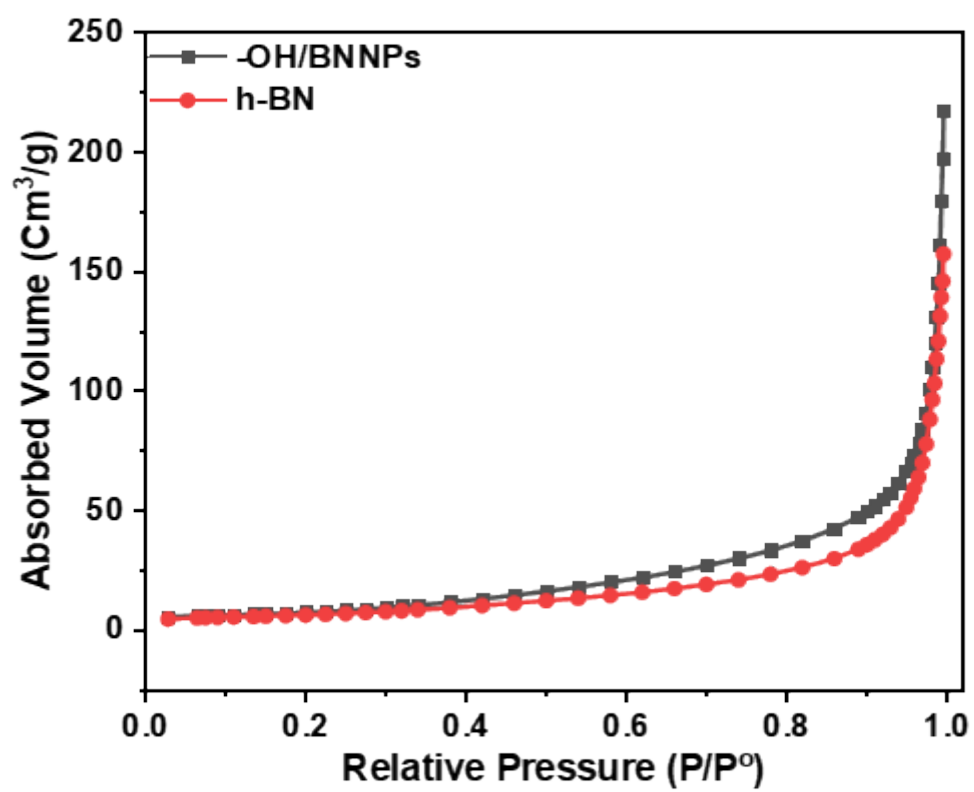

**Fig. S4:** BET surface area analysis: N<sub>2</sub>-adsorption isotherm of OH/BNNPs and bulk h-BN.

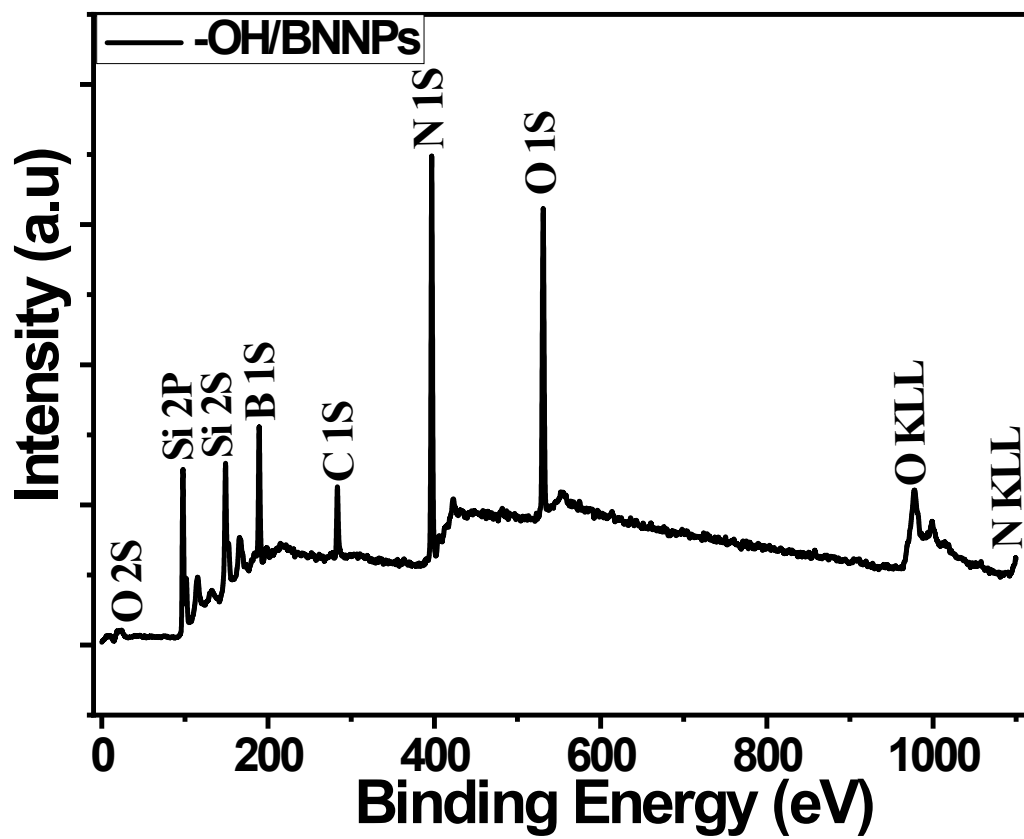

Fig. S5: Survey XPS spectra of -OH/BNNPs.

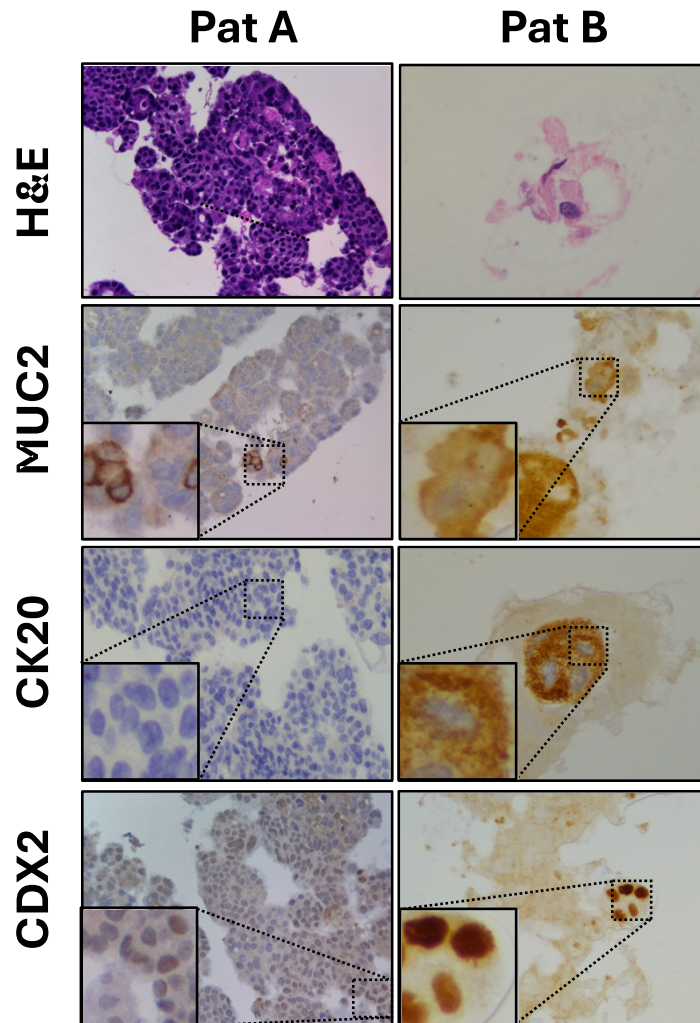

**Fig. S6.** Hematoxylin/eosin staining and immunohistochemistry on PDTO obtained from (PAT A and B). Muc2 (Mucin 2), CK20 (cytokeratin 20), CdX2 (Caudal-type homeobox 2) markers of colorectal cancer. IHC images were done at 20X.
